# Supplementary material for: Drosophila SPG12 ortholog, reticulon-like 1, governs presynaptic ER organization and Ca2+ dynamics
Source: PubMed Central journal article supplement (PMC10072275; doi:10.1083/jcb.202112101), 2023-03-23

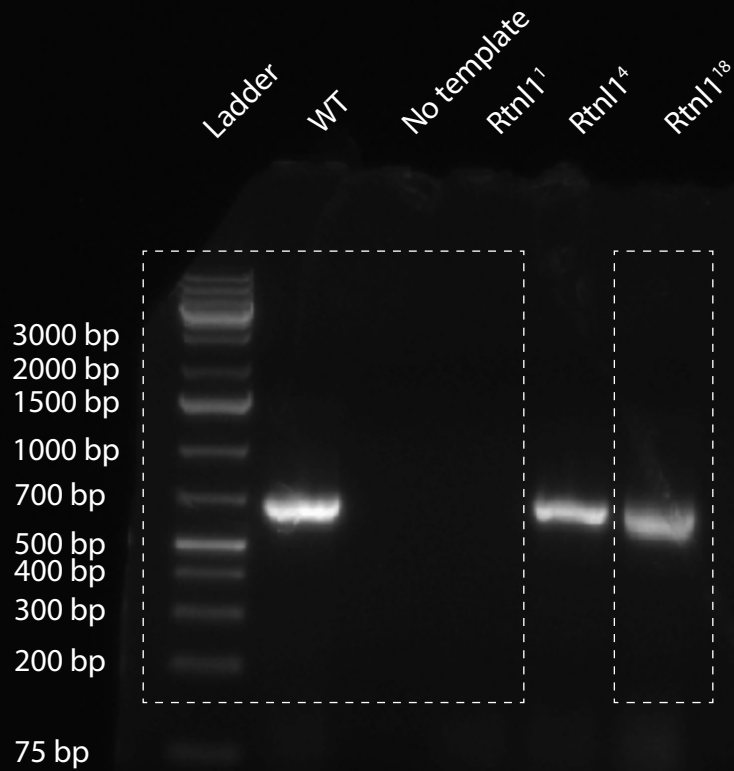

Supplement: JCB_202112101_SourceDataFS2.pdf [file JCB_202112101_SourceDataFS2.pdf]
